# Supplementary material
Source: Elsevier journal article supplement (https://www.sciencedirect.com/science/article/pii/S0014256515000090)
Supplement: mmc1 [file S0014256515000090:mmc1.docx]

Respuesta correcta: Teratoma maduro del omento mayor.

La tumoración presenta densidad grasa (misma densidad que el tejido celular subcutáneo) y calcificaciones en su pared. Estas características son diagnósticas de teratoma quístico maduro. Los componentes sólidos en la vertiente posterior de la lesión se describen como los nódulos de Rokitansky y las múltiples interfaces hiperecogénicas lineales dentro de la lesión vistas en la ecografía constituyen el signo conocido como red dermoide y son debidas a las fibras de pelos.
